# Supplementary material for: Effect of SO2 introduction into CeO2 on its surface acidity and redox property for the selective catalytic reduction of NO with NH3
Source: Royal Society of Chemistry journal article supplement (doi:10.1039/d3nj03924b), 2023-01-01
Supplement: d3nj03924b1.pdf [file d3nj03924b1.pdf]

Effect of SO<sub>2</sub> introduction into CeO<sub>2</sub> on its surface acidity and redox property on the  
selective catalytic reduction of NO with NH<sub>3</sub>  
supporting material

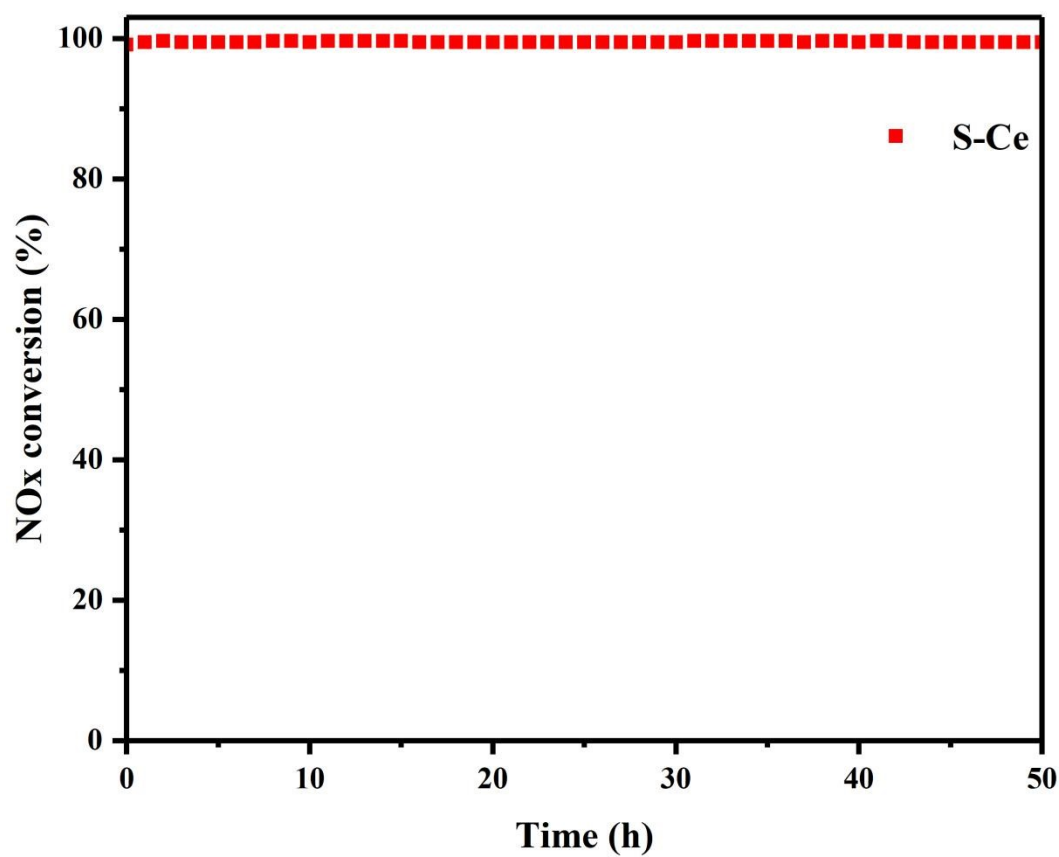

Fig. S1. the stability test of S-Ce catalysts
